# Supplementary material for: Grape seed proanthocyanidin extract ameliorates dextran sulfate sodium-induced colitis through intestinal barrier improvement, oxidative stress reduction, and inflammatory cytokines and gut microbiota modulation
Source: Royal Society of Chemistry journal article supplement (doi:10.1039/d0fo01418d), 2020-01-01
Supplement: d0fo01418d1.pdf [file d0fo01418d1.pdf]

## Supplementary Data

Tables: 6

Grape seed proanthocyanidin extract ameliorates dextran sulfate sodium-induced colitis through intestinal barrier improvement, oxidative stress reduction, and inflammatory cytokines and gut microbiota modulation

Kangliang Sheng<sup>a,b,c</sup>, Guanghui Zhang<sup>a,b,c</sup>, Ming Sun<sup>a,b,c</sup>, Shiman He<sup>a,b,c</sup>, Xiaowei Kong<sup>a,b,c</sup>, Jingmin Wang<sup>a,b,c</sup>, Fenfang Zhu<sup>a,b,c</sup>, Xiangdong Zha<sup>a,b,c</sup>, Yongzhong Wang<sup>a,b,c,d\*</sup>

<sup>a</sup> School of Life Sciences, Anhui University, Hefei 230601, Anhui, China.

<sup>b</sup> Key Laboratory of Human Microenvironment and Precision Medicine of Anhui Higher Education Institutes, Anhui University, Hefei 230601, Anhui, China.

<sup>c</sup> Anhui Key Laboratory of Modern Biomanufacturing, Hefei 230601, Anhui, China.

<sup>d</sup> Institute of Physical Science and Information Technology, Anhui University, Hefei 230601, Anhui, China.

\* Corresponding author:

Yongzhong Wang,

E-mail: yzwang@ahu.edu.cn (Y. Wang)

**Table S1** Disease activity index (DAI) scoring system

| DAI score | Weight loss (%) | Stool consistency | Occult/gross bleeding |
|-----------|-----------------|-------------------|-----------------------|
| 0         | None            | Normal            | Normal                |
| 1         | 1-5             |                   |                       |
| 2         | 6-10            | Loose stools      | Hemoccult positive    |
| 3         | 11-18           |                   |                       |
| 4         | >18             | Diarrhea          | Gross bleeding        |

**Table S2** Pathological scores system

| Score | Inflammation | Mucosal damage        | Crypt damage         | Range of lesions(%) |
|-------|--------------|-----------------------|----------------------|---------------------|
| 0     | None         | None                  | None                 | 0                   |
| 1     | Mild         | Mucous layer          | 1/3                  | 1-25                |
| 2     | Moderate     | submucosa             | 2/3                  | 26-50               |
| 3     | Severe       | Muscularis and serosa | 100%                 | 51-75               |
| 4     | -            | -                     | 100%+epithelium loss | 76-100              |

**Table S3** Oligonucleotide primers used for RT-qPCR

| <b>Gene</b>    | <b>5'-3' Primer sequence</b> |
|----------------|------------------------------|
| TNF- $\alpha$  | F: ATGAGAAGTTCCCAAATGGC      |
|                | R: CTCCACTTGGTGGTTTGCTA      |
| IL-1 $\beta$   | F: TGCCACCTTTTGACAGTGATG     |
|                | R: AAGGTCCACGGGAAAGACAC      |
| IL-10          | F:GGACCAGCTGGACAACATACTGCTA  |
|                | R: CCGATAAGGCTTGGCAACCCAAGT  |
| NLRP3          | F: TGGAAGATTACCCGCCCGAGAA    |
|                | R: TCCAGCAAACCCATCCACTCTTC   |
| Caspase-1      | F: TGAAAGACAAGCCCAAGGTGATC   |
|                | R:CAATGAAAAGTGAGCCCCTGAC     |
| ASC            | F: CATCTTGTCTTGGCTGGTGGTCT   |
|                | R: CGGACACGGACAGGATTGACA     |
| ZO-1           | F: TCTTCCATCATTTGCTGTGT      |
|                | R: TCTGAAACCATCAAGTCCACA     |
| Occludin       | F: TCACTTTTCCTGCGGTGACT      |
|                | R: GGGAACGTGGCCGATATAATG     |
| Claudin        | F: ATGCAAAGATGTTTTGCCACAG    |
|                | R: TACAAATCCCATTGCAGCCC      |
| $\beta$ -actin | F: TGTCCACCTTCCAGCAGATGT     |
|                | R: AGCTCAGTAACAGTCCGCCTAGA   |

**Table S4** Significantly different phyla altered by the treatment of GSPE in mice

| Species name          | Relative abundance |               |             |           |              |            |
|-----------------------|--------------------|---------------|-------------|-----------|--------------|------------|
|                       | Control-Mean(%)    | Control-SD(%) | DSS-Mean(%) | DSS-SD(%) | GSPE-Mean(%) | GSPE-SD(%) |
| p__Firmicutes         | 67.41              | 2.548         | 37.41       | 5.41      | 40.6         | 5.88       |
| p__Bacteroidetes      | 20.24              | 3.322         | 42.11       | 6.32      | 30.37        | 4.53       |
| p__Proteobacteria     | 7.757              | 2.392         | 8.942       | 17.1      | 12.62        | 10.12      |
| p__Actinobacteria     | 2.575              | 1.035         | 5.249       | 3.081     | 4.045        | 3.942      |
| p__Epsilonbacteraeota | 0.7992             | 0.9475        | 0.6497      | 1.018     | 5.867        | 8.902      |
| p__Patescibacteria    | 0.5947             | 0.5286        | 4.748       | 6.573     | 0.8259       | 1.109      |
| p__Verrucomicrobia    | 0.3568             | 0.4053        | 0.01834     | 0.02322   | 5.104        | 1.13       |

Data are expressed as mean  $\pm$  standard deviation, n=5.

**Table S5** Significantly different families altered by the treatment of GSPE in mice

| Species name             | Relative abundance |               |             |           |              |            |
|--------------------------|--------------------|---------------|-------------|-----------|--------------|------------|
|                          | Control-Mean(%)    | Control-SD(%) | DSS-Mean(%) | DSS-SD(%) | GSPE-Mean(%) | GSPE-SD(%) |
| f__Muribaculaceae        | 12.7               | 4.186         | 34.38       | 2.21      | 14.61        | 1.787      |
| f__Staphylococcaceae     | 36.25              | 21.59         | 0.443       | 0.9334    | 5.566        | 12.43      |
| f__Erysipelotrichaceae   | 9.505              | 8.707         | 13.7        | 6.701     | 16.21        | 11.22      |
| f__Lactobacillaceae      | 3.655              | 4.261         | 12.7        | 7.597     | 3.717        | 4.668      |
| f__Lachnospiraceae       | 5.317              | 8.45          | 3.189       | 2.876     | 5.625        | 6.364      |
| f__Burkholderiaceae      | 1.983              | 2.727         | 3.484       | 5.931     | 8.539        | 6.946      |
| f__Prevotellaceae        | 3.211              | 2.796         | 3.321       | 2.395     | 5.329        | 4.339      |
| f__Ruminococcaceae       | 3.572              | 0.308         | 2.62        | 0.232     | 5.051        | 0.497      |
| f__Bacteroidaceae        | 2.345              | 2.553         | 2.496       | 4.181     | 6.224        | 6.711      |
| f__Enterobacteriaceae    | 2.299              | 3.506         | 4.45        | 9.905     | 2.748        | 3.668      |
| f__Helicobacteraceae     | 0.7992             | 0.9475        | 0.6497      | 1.018     | 5.867        | 8.902      |
| f__Peptostreptococcaceae | 3.923              | 3.068         | 0.4291      | 0.7438    | 1.821        | 1.046      |
| f__Saccharimonadaceae    | 0.5947             | 0.5286        | 4.748       | 6.573     | 0.8259       | 1.109      |
| f__Akermansiaceae        | 0.3568             | 0.4053        | 0.01834     | 0.02322   | 5.104        | 10.13      |
| f__Rikenellaceae         | 1.319              | 0.9512        | 0.9938      | 0.453     | 2.117        | 1.554      |
| f__Bifidobacteriaceae    | 0.6503             | 0.8399        | 1.53        | 2.944     | 1.935        | 2.028      |
| f__Enterococcaceae       | 2.267              | 4.242         | 1.304       | 2.813     | 5.104        | 0.13       |
| f__Atopobiaceae          | 0.2618             | 0.4611        | 1.782       | 0.5845    | 1.37         | 1.968      |
| f__Veillonellaceae       | 0.7792             | 1.722         | 2.05        | 4.58      | 0.2718       | 0.5661     |
| f__Desulfovibrionaceae   | 0.777              | 1.103         | 0.9727      | 1.321     | 1.13         | 0.8294     |
| f__Eggerthellaceae       | 0.4697             | 0.1344        | 1.925       | 1.592     | 0.3668       | 0.2966     |
| f__Moraxellaceae         | 2.091              | 2.449         | 0.001112    | 0.002486  | 0.03168      | 0.06622    |
| f__Marinifilaceae        | 0.2462             | 0.4501        | 0.2446      | 0.2504    | 1.239        | 1.798      |

Data are expressed as mean  $\pm$  standard deviation, n=5.

**Table S6** Significantly different genera altered by the treatment of GSPE in mice

| Species name                      | Relative abundance |               |             |           |              |            |
|-----------------------------------|--------------------|---------------|-------------|-----------|--------------|------------|
|                                   | Control-Mean(%)    | Control-SD(%) | DSS-Mean(%) | DSS-SD(%) | GSPE-Mean(%) | GSPE-SD(%) |
| g_norank_f_Muribaculaceae         | 12.68              | 4.185         | 34.05       | 20.87     | 14.61        | 8.786      |
| g_Staphylococcus                  | 33.81              | 20.01         | 0.3613      | 0.7739    | 5.116        | 11.43      |
| g_Lactobacillus                   | 3.655              | 0.426         | 12.7        | 0.759     | 3.717        | 0.4668     |
| g_Dubosiella                      | 5.158              | 0.5327        | 9.103       | 1.89      | 4.109        | 0.4311     |
| g_Ileibacterium                   | 2.647              | 3.847         | 2.71        | 5.384     | 9.286        | 9.105      |
| g_Parasutterella                  | 1.684              | 2.875         | 3.462       | 5.937     | 8.476        | 7.004      |
| g_Bacteroides                     | 2.345              | 2.553         | 2.496       | 4.181     | 6.224        | 6.711      |
| g_Escherichia-Shigella            | 2.294              | 3.505         | 4.437       | 9.909     | 2.745        | 3.67       |
| g_Helicobacter                    | 0.7992             | 0.9475        | 0.6497      | 1.018     | 5.867        | 8.902      |
| g_Lachnospiraceae_NK4A136_group   | 3.992              | 7.554         | 1.082       | 1.45      | 1.685        | 2.231      |
| g_Romboutsia                      | 3.923              | 3.068         | 0.4291      | 0.7438    | 1.821        | 1.046      |
| g_Candidatus_Saccharimonas        | 0.5947             | 0.5286        | 4.748       | 6.573     | 0.8259       | 1.109      |
| g_Prevotellaceae_UCG-001          | 1.855              | 2.167         | 1.671       | 1.481     | 2.26         | 1.744      |
| g_Akkermansia                     | 0.3568             | 0.4053        | 0.01834     | 0.02322   | 5.104        | 1.013      |
| g_unclassified_f_Prevotellaceae   | 0.8782             | 1.034         | 1.246       | 1.923     | 2.587        | 2.65       |
| g_Turicibacter                    | 0.9754             | 0.5342        | 1.282       | 2.12      | 1.869        | 2.669      |
| g_Bifidobacterium                 | 0.6503             | 0.8399        | 1.53        | 2.944     | 1.935        | 2.028      |
| g_Enterococcus                    | 2.267              | 4.242         | 1.303       | 2.811     | 0.5213       | 0.6562     |
| g_Ruminococcaceae_UCG-014         | 1.542              | 2.517         | 1.304       | 1.443     | 1.189        | 1.927      |
| g_Coriobacteriaceae_UCG-002       | 0.2618             | 0.4611        | 1.782       | 0.5845    | 1.37         | 1.968      |
| g_Veillonella                     | 0.7792             | 0.022         | 2.049       | 0.458     | 0.2712       | 0.056      |
| g_[Eubacterium]_fissicatena_group | 0.05669            | 0.08198       | 0.7003      | 1.403     | 1.976        | 3.667      |
| g_Jeotgalicoccus                  | 2.185              | 1.592         | 0.08059     | 0.1603    | 0.4191       | 0.9355     |
| g_unclassified_f_Lachnospiraceae  | 0.3818             | 0.5913        | 0.8693      | 0.7995    | 1.094        | 1.991      |
| g_Alistipes                       | 0.6853             | 0.7585        | 0.438       | 0.4871    | 1.063        | 0.9597     |
| g_Psychrobacter                   | 2.09               | 2.45          | 0           | 0         | 0.02946      | 0.06587    |
| g_norank_f_Desulfovibrionaceae    | 0.4969             | 0.8733        | 0.6119      | 1.139     | 1.009        | 0.8207     |
| g_Enterorhabdus                   | 0.3135             | 0.1           | 1.307       | 1.134     | 0.2496       | 0.2249     |
| g_Odoribacter                     | 0.2379             | 0.4467        | 0.2234      | 0.2274    | 1.233        | 1.801      |
| g_unclassified_f_Ruminococcaceae  | 0.3946             | 0.4502        | 0.4235      | 0.4915    | 0.6925       | 0.4877     |
| g_Ruminiclostridium_5             | 0.3741             | 0.5224        | 0.04002     | 0.04208   | 1.029        | 1.423      |
| g_norank_f_Muribaculaceae         | 12.68              | 4.185         | 34.05       | 20.87     | 14.61        | 8.786      |
| g_Staphylococcus                  | 33.81              | 20.01         | 0.3613      | 0.7739    | 5.116        | 11.43      |

Data are expressed as mean  $\pm$  standard deviation, n=5.
